# Supplementary material for: Assessing the influence of long-range transport of aerosols on the PM 2.5 chemical composition and concentration in the Aburrá Valley
Source: Copernicus journal article supplement (doi:10.5194/egusphere-2024-695), 2024-04-18
Supplement: Supplementary file 1 [file egusphere-2024-695-supplement.pdf]

# Supplementary material for:

## Assessing the influence of long-range transport of aerosols on the PM2.5 chemical composition and concentration in the Aburrá Valley

Maria P. Velásquez-García<sup>1,3,4\*</sup>, K. Santiago Hernández<sup>2</sup>, James Vergara-Correa<sup>1</sup>, Richard J. Pope<sup>3,4</sup>, Miryam Gomez-Marín<sup>1</sup> and Angela M. Rendón<sup>2</sup>

<sup>1</sup> Grupo de Higiene y Gestión Ambiental, Politécnico Jaime Isaza Cadavid, Medellín, Colombia

<sup>2</sup> Grupo de Investigación en Ingeniería y Gestión Ambiental, Universidad de Antioquia, Medellín, Colombia

<sup>3</sup> School of Earth and Environment, University of Leeds, Leeds, UK

<sup>4</sup> National Centre for Earth Observation, University of Leeds, Leeds, UK

---

\*Corresponding author: Maria P. Velásquez-García

E-mail: mpvelasquez@unal.edu.co

Politécnico Jaime Isaza Cadavid

Medellín, Colombia

### Table of contents

|                                                                                                                                                                                                                                                                                                                                                                   |   |
|-------------------------------------------------------------------------------------------------------------------------------------------------------------------------------------------------------------------------------------------------------------------------------------------------------------------------------------------------------------------|---|
| <b>Figure S1.</b> Average magnitudes of OM-AOD (a.), Du-AOD (b.), and TCSO <sub>2</sub> (c.) concentration around the events. Different colors represent different anomalies. The shadowed region delimits the event.                                                                                                                                             | 2 |
| <b>Figure S2.</b> OM-AOD, Du-AOD and TCSO <sub>2</sub> time series and event periods for (a) BB-LRT, (b) Dust-LRT and (c) Volcanic-LRT along with chemical sampling days for the selected events.                                                                                                                                                                 | 2 |
| <b>Figure S3.</b> PMF's Factor profiles for the models run for the set of sampling days for (a) BB aerosols, (b) dust and (c) volcanic aerosols.                                                                                                                                                                                                                  | 4 |
| <b>Figure S4.</b> Factor contribution for BB, dust, and volcanic emissions factors identified in the PMF models for BB-LRT, Dust-LRT, and Volcanic-LRT                                                                                                                                                                                                            | 5 |
| <b>Table S1.</b> Average magnitudes in µg/m <sup>3</sup> of the concentration of PM <sub>2.5</sub> and its chemical components during the study period and before, during and after the identified events of (a) BB aerosols, (b) dust and (c) volcanic aerosols. The components that increased according to surrounding magnitudes for each event were shadowed. | 3 |

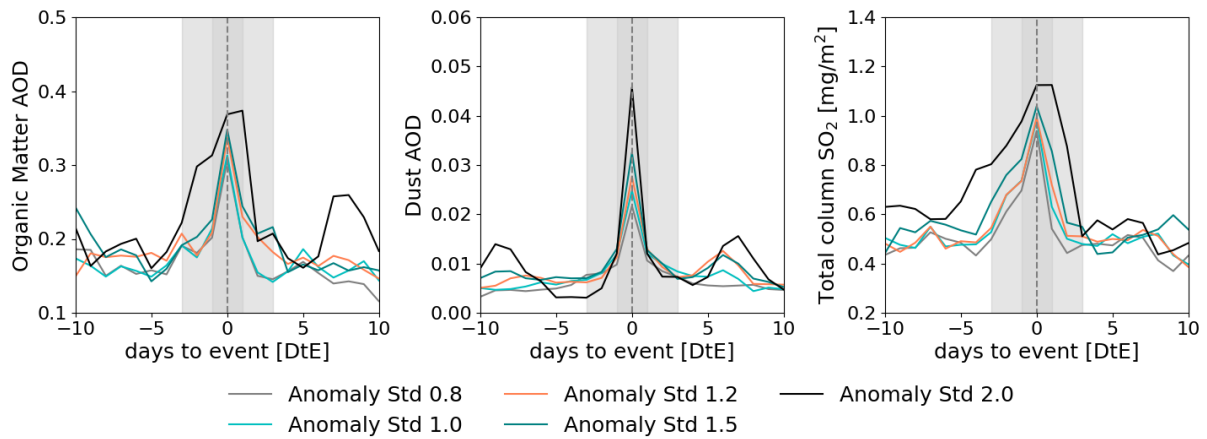

**Figure S1.** Average magnitudes of OM-AOD (a.), Du-AOD (b.), and TCSO<sub>2</sub> (c.) concentration around the events. Different colors represent different anomalies. The shadowed region delimits the event.

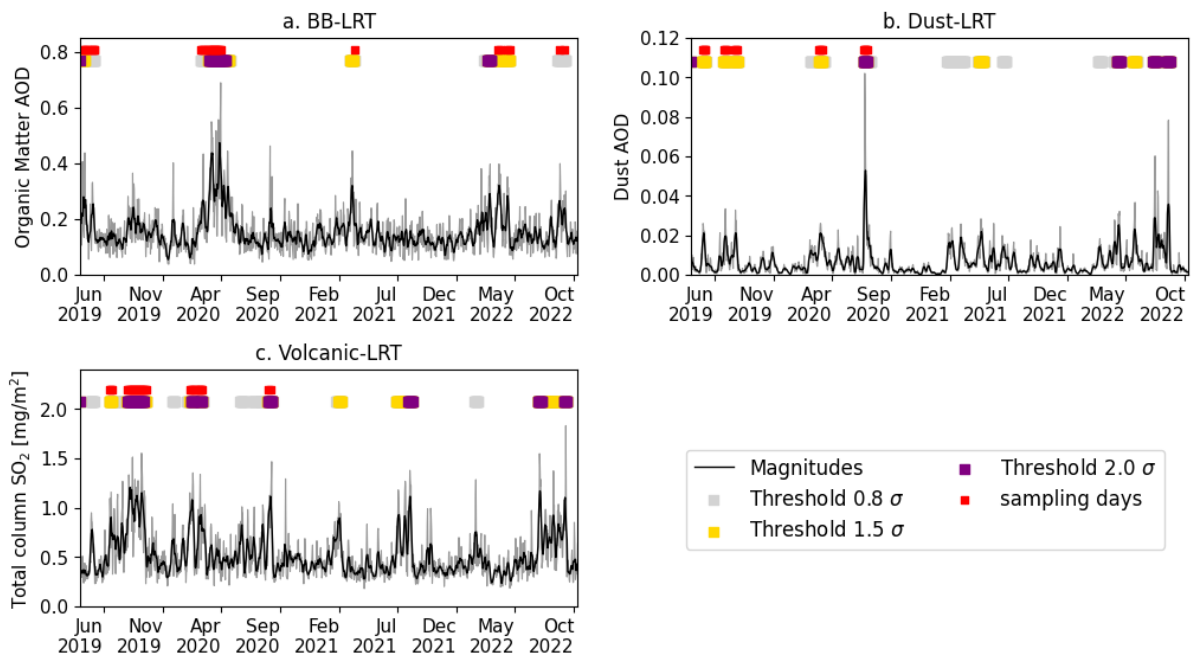

**Figure S2.** OM-AOD, Du-AOD and TCSO<sub>2</sub> time series and event periods for (a) BB-LRT, (b) Dust-LRT and (c) Volcanic-LRT along with chemical sampling days for the selected events.

**Table S1.** Median magnitudes in ng/m<sup>3</sup> of the concentration of PM<sub>2.5</sub> chemical compounds during the study period and during and around (before and after) the identified events of BB-LRT, Dust-LRT and Volcanic-LRT. The ratio OC/EC and SOC/OC are also included, these are dimensionless.

|           | Median  | Median BB-LRT | Median Around BB-LRT | Median Dust-LRT | Median Around Dust-LRT | Median Volcanic-LRT | Median Around Volcanic-LRT |
|-----------|---------|---------------|----------------------|-----------------|------------------------|---------------------|----------------------------|
| Be        | 0.01    | 0.02          | 0.01                 | 0.01            | 0.02                   | 0.01                | 0.01                       |
| Na        | 202.69  | 331.22        | 101.71               | 11.69           | 221.57                 | 539.06              | 194.07                     |
| Mg        | 77.04   | 109.44        | 64.61                | 78.81           | 81.64                  | 112.55              | 85.34                      |
| Al        | 445.42  | 542.72        | 318.58               | 525.32          | 414.15                 | 671.58              | 450.85                     |
| Si        | 231.83  | 282.48        | 165.82               | 273.42          | 215.55                 | 349.54              | 234.66                     |
| K         | 240.44  | 256.3         | 233.41               | 289.36          | 207.07                 | 210.85              | 203.13                     |
| Ca        | 259.26  | 313.05        | 187.94               | 262.92          | 259.26                 | 416.02              | 257.21                     |
| Ti        | 18.34   | 25.99         | 14.82                | 24.2            | 20.51                  | 31.27               | 18.93                      |
| V         | 1.26    | 1.39          | 0.85                 | 1.44            | 1.29                   | 1.83                | 1.34                       |
| Cr        | 1.46    | 1.67          | 0.87                 | 1.47            | 1.47                   | 2.3                 | 1.37                       |
| Mn        | 3.97    | 4.64          | 3.45                 | 4.44            | 4.05                   | 5.76                | 3.8                        |
| Fe        | 210.14  | 285.44        | 139.29               | 285.44          | 239.16                 | 346.95              | 234.13                     |
| Co        | 0.21    | 0.17          | 0.14                 | 0.23            | 0.19                   | 0.25                | 0.23                       |
| Ni        | 1.79    | 1.71          | 1.58                 | 2               | 1.63                   | 2.67                | 1.9                        |
| Cu        | 6.83    | 6.62          | 6.94                 | 4.38            | 5.37                   | 5.18                | 3.93                       |
| Zn        | 24.65   | 29.25         | 25.76                | 19.4            | 22.86                  | 26.76               | 20.31                      |
| As        | 0.98    | 0.7           | 1                    | 0.77            | 0.9                    | 0.62                | 0.77                       |
| Se        | 0.56    | 0             | 0.74                 | 0.37            | 0.66                   | 0.77                | 0.61                       |
| Mo        | 0.29    | 0.26          | 0.3                  | 0.2             | 0.23                   | 0.24                | 0.19                       |
| Ag        | 0.02    | 0.01          | 0.04                 | 0.02            | 0.01                   | 0.02                | 0.01                       |
| Cd        | 0.13    | 0.18          | 0.11                 | 0.08            | 0.15                   | 0.13                | 0.14                       |
| Sb        | 0.79    | 0.62          | 0.75                 | 0.74            | 0.83                   | 0.8                 | 0.8                        |
| Ba        | 11.5    | 13.3          | 10.96                | 10.71           | 10.16                  | 17.66               | 10.88                      |
| Hg        | 0.08    | 0.04          | 0.08                 | 0.05            | 0.08                   | 0.1                 | 0.08                       |
| Pb        | 3.31    | 2.71          | 3.11                 | 2.81            | 3.67                   | 3.19                | 3.16                       |
| Fluoride  | 13.29   | 34.04         | 10.8                 | 27.58           | 22.39                  | 14.01               | 19.72                      |
| Chloride  | 71.75   | 253.53        | 149.07               | 96.1            | 186.56                 | 101.93              | 103.37                     |
| Nitrate   | 400.79  | 529.11        | 595.34               | 394.31          | 441.75                 | 384.72              | 396.03                     |
| Sulphate  | 1376.4  | 2790.83       | 1899.46              | 1826.07         | 1472.98                | 1096.26             | 1474.96                    |
| Potassium | 88.76   | 118.94        | 111.8                | 96.88           | 87.13                  | 134.67              | 37.2                       |
| magnesium | 10.55   | 13.74         | 11.97                | 11.92           | 12.15                  | 8.51                | 9.49                       |
| Calcium   | 24.97   | 31.52         | 27                   | 30.79           | 29.96                  | 19.93               | 21.76                      |
| Sodium    | 164.6   | 124.84        | 22.62                | 134.06          | 267.04                 | 322.77              | 125.08                     |
| C         | 6269.62 | 10191.5       | 6902.07              | 6661.92         | 7437.02                | 8214.57             | 6440.68                    |
| OC        | 5568.07 | 9249.99       | 5978.83              | 5762.34         | 6728.79                | 7375.77             | 5719.63                    |
| EC        | 694     | 778.54        | 782.29               | 778.54          | 729.04                 | 724.98              | 696.7                      |
| OC1       | 1162.73 | 2001.79       | 1237.05              | 1101.18         | 1320.94                | 1352.2              | 1115.57                    |
| OC2       | 1217.86 | 2286.4        | 1247.75              | 1217.86         | 1444.06                | 1495.25             | 1218.81                    |

|        |         |         |         |         |         |         |         |
|--------|---------|---------|---------|---------|---------|---------|---------|
| OC3    | 470.91  | 764.49  | 481.52  | 498.86  | 581.24  | 599.19  | 470.99  |
| OC4    | 725.17  | 1221.59 | 806.68  | 807.4   | 945.4   | 886.61  | 759.74  |
| OC5    | 9.53    | 13.12   | 11.01   | 14.16   | 17.58   | 20.42   | 11.16   |
| PyC    | 1902.34 | 3231.61 | 1982.31 | 1855.19 | 2001.91 | 2703.61 | 2105.51 |
| EC1    | 277.01  | 453.57  | 284.18  | 271.09  | 251.99  | 324.86  | 303.31  |
| EC2    | 1383.02 | 2080.26 | 1041.19 | 1183.03 | 1130.96 | 1454.13 | 1632.26 |
| EC3    | 652.09  | 778.04  | 766.96  | 1030.82 | 1013.25 | 915.21  | 751.53  |
| EC4    | 88.97   | 77.92   | 97.08   | 233.35  | 185.49  | 150.8   | 103.67  |
| EC5    | 17.29   | 22.44   | 18.85   | 20.16   | 20.42   | 19.9    | 16.87   |
| EC6    | 18.34   | 24.83   | 19.2    | 20.56   | 19.43   | 20.68   | 15.97   |
| OC/EC  | 7.84    | 11.29   | 7.21    | 7.71    | 7.76    | 9.51    | 8.13    |
| SOC    | 1871.01 | 5034.98 | 1085.18 | 3064.9  | 3064.06 | 2928.61 | 2429.04 |
| SOC/OC | 0.34    | 0.54    | 0.2     | 0.46    | 0.41    | 0.46    | 0.39    |

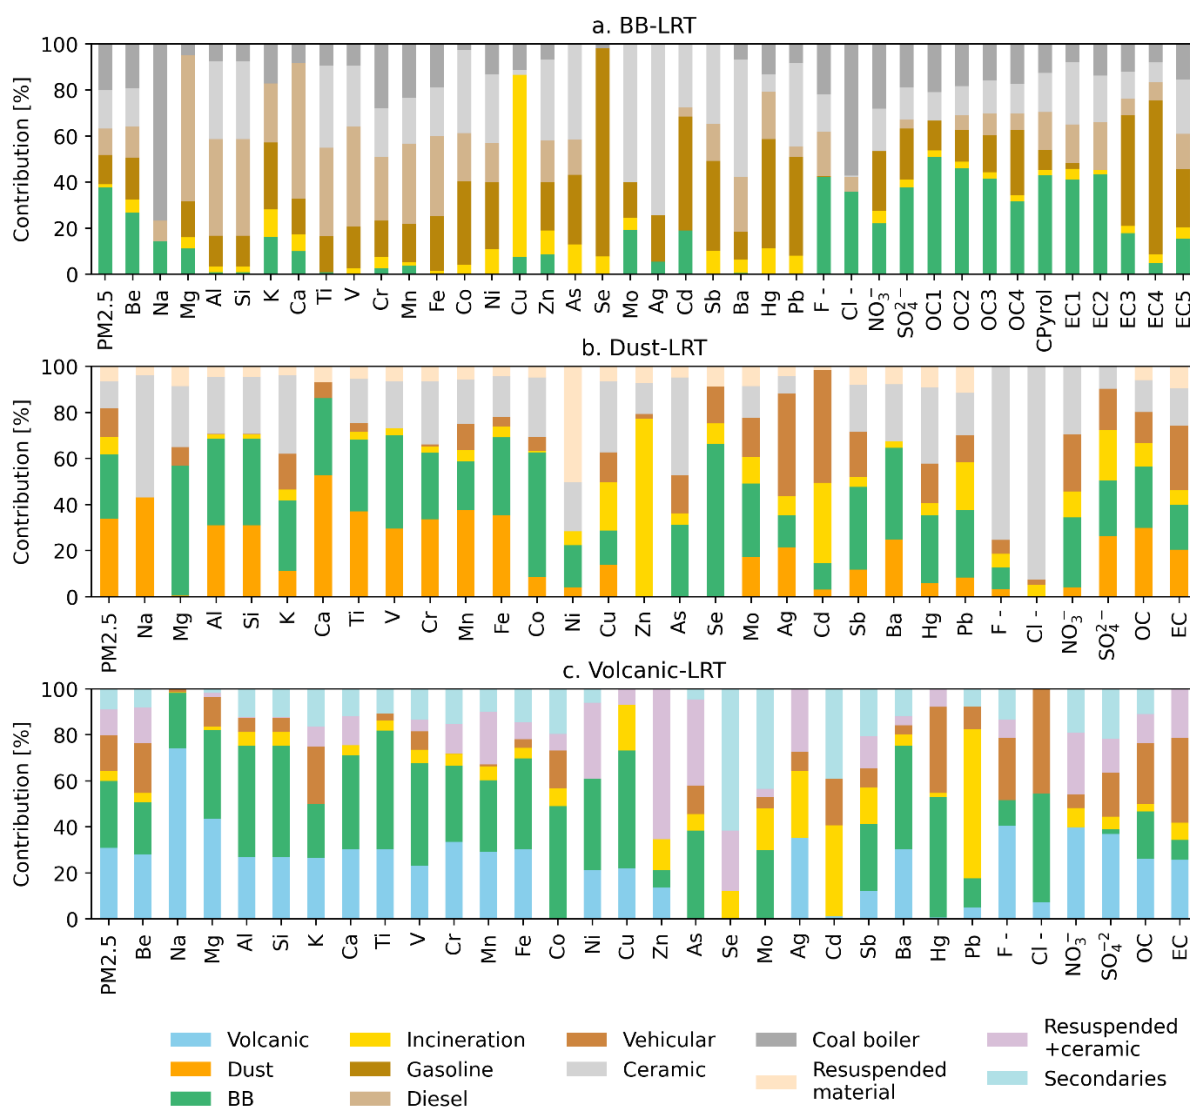

**Figure S3.** PMF's Factor profiles for the models run for the set of sampling days for (a) BB aerosols, (b) dust and (c) volcanic aerosols.

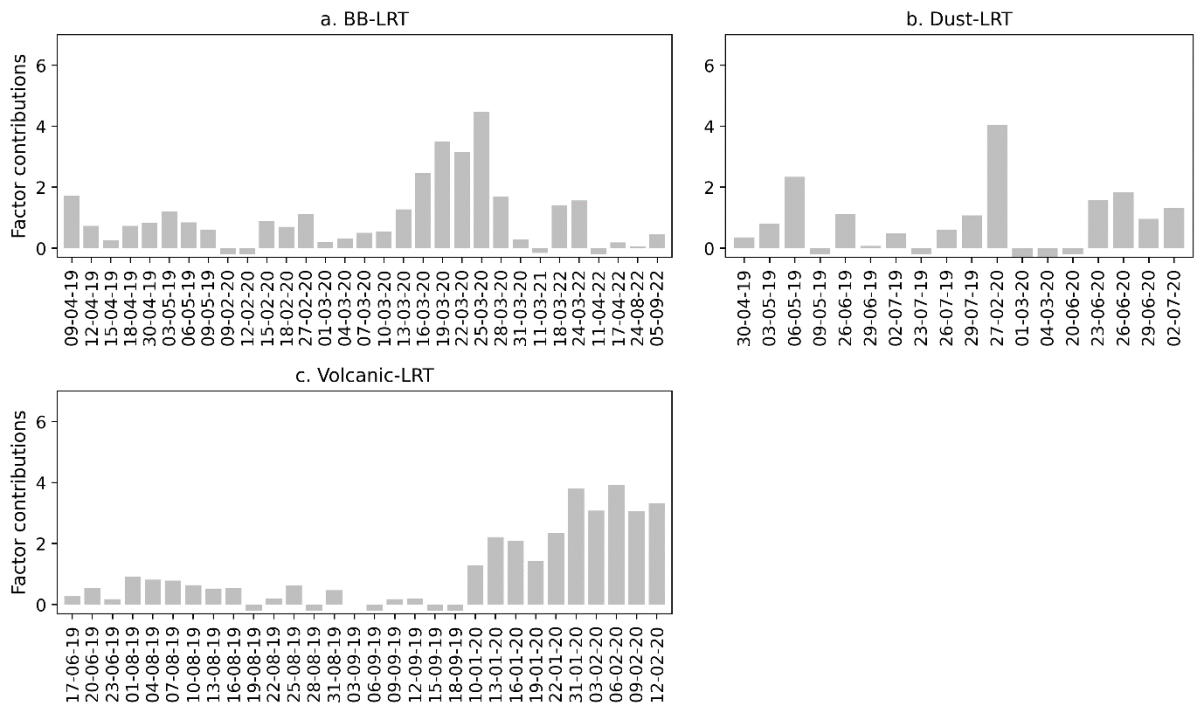

**Figure S4.** Factor contribution for BB, dust, and volcanic emissions factors identified in the PMF models for BB-LRT, Dust-LRT, and Volcanic-LRT
